# Supplementary material
Source: Springer Nature journal article supplement (https://www.springermedizin.de/resource/supplementary/12888_2013_1399_MOESM6_ESM.pdf/9480130)

**ANY BRAIN**

**PREFRONTAL CORTEX**

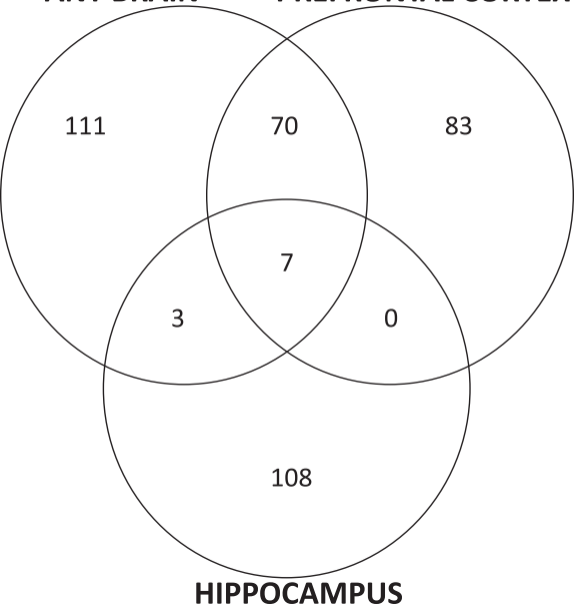

111

70

83

7

3

0

108

**HIPPOCAMPUS**

Supplement: MOESM6 [file 9480130]
